# Supplementary material for: (enH2)4.5[In(AsVS4)3][As2III(μ-S2)S3]Cl and (enH2)MnAsIIIAsVS6: two thioarsenates(iii,v) with mixed-valent optical properties
Source: Royal Society of Chemistry journal article supplement (doi:10.1039/c3dt53048e), 2013-12-02
Supplement: c3dt53048e.pdf [file c3dt53048e.pdf]

## **(enH<sub>2</sub>)<sub>4.5</sub>[In(As<sup>V</sup>S<sub>4</sub>)<sub>3</sub>][As<sub>2</sub><sup>III</sup>(μ-S<sub>2</sub>)S<sub>3</sub>]Cl and (enH<sub>2</sub>)MnAs<sup>III</sup>As<sup>V</sup>S<sub>6</sub>: Two thioarsenates(III, V) with mixed-valent optical properties**

Ke-Zhao Du<sup>a</sup>, Mei-Ling Feng<sup>a</sup>, Xing-Hui Qi<sup>a,c</sup>, Zu-Ju Ma<sup>a</sup>, Long-Hua Li<sup>a</sup>,  
Jian-Rong Li<sup>a</sup>, Cheng-Feng Du<sup>a,b</sup>, Guo-Dong Zou<sup>a,b</sup>, Xiao-Ying Huang<sup>a,\*</sup>

<sup>a</sup> State Key Laboratory of Structural Chemistry, Fujian Institute of Research on the Structure of Matter, the Chinese Academy of Sciences, Fuzhou, Fujian 350002, P.R. China

<sup>b</sup> University of the Chinese Academy of Sciences, Beijing 100049, P. R. China

<sup>c</sup> College of Chemistry and Chemical Engineering, Fuzhou University, Fuzhou, Fujian 350002, P.R. China

Fax: +86 591 83793727; Tel: +86 591 83793727; E-mail: [xyhuang@fjirsm.ac.cn](mailto:xyhuang@fjirsm.ac.cn)

### **1. Synthesis**

Compound **1** was obtained from a mixture of In (0.116 g, 1.01 mmol), As<sub>2</sub>S<sub>3</sub> (0.248 g, 1.00 mmol), S (0.099 g, 3.09 mmol), and NH<sub>4</sub>Cl (0.080 g, 1.50 mmol), 0.2 mL ethanediamine, and 6 mL CH<sub>3</sub>OH, which was sealed in a stainless steel reactor with a 20 mL Teflon liner and heated to 150 °C within 4h. After 6d at 150 °C, the reactor was cooled down to room temperature at the rate of 1 °C/h. The product consisted of dark green crystals of **1** and a small amount of yellow powder after washed by ethanol and ether. The crystals were selected by hand (stable in the air) in 16.3% yield based on S (0.040 g). Elemental analysis, calcd. (%) of **1**: C 8.01, H 3.36, N 9.34; found: C 8.12, H 3.37, N 9.25.

Compound **2** was obtained from a mixture of LaCl<sub>3</sub>·7H<sub>2</sub>O (0.182 g, 0.49 mmol), As<sub>2</sub>S<sub>2</sub> (0.106 g, 0.50 mmol), S (0.081 g, 2.53 mmol), Mn (0.063 g, 1.14 mmol) and NH<sub>4</sub>Cl (0.047 g, 0.88 mmol), 0.1 mL ethanediamine, and 3 mL H<sub>2</sub>O, which was sealed in a stainless steel reactor with a 28 mL Teflon liner and heated to 130 °C within 2h. After 3.5d at 130 °C, the reactor was cooled down to room temperature at the rate of 2 °C/h. The product consisted of dark red crystals of **2** and a small amount of black powder after washed by ethanol and ether. The crystals were selected by hand (stable in the air) in 20.9% yield based on As<sub>2</sub>S<sub>2</sub> (0.048 g). Elemental analysis, calcd. (%) of **2**: C 5.23, H 2.19, N 6.10; found: C 5.35, H 2.28, N 6.07. Although the LaCl<sub>3</sub>·7H<sub>2</sub>O hasn't entered the crystal structure, it was essential for the synthesis of compound **2**, as we could not obtain the

compound **2** in the absence of  $\text{LaCl}_3 \cdot 7\text{H}_2\text{O}$ . Since  $\text{LaCl}_3 \cdot 7\text{H}_2\text{O}$  is a Lewis acid, it may influence the pH of the reaction system which is the key to synthesizing thioarsenates.<sup>1</sup>

## 2. Crystal Structure

The intensity data were collected on an Oxford Xcalibur Eos CCD diffractometer with graphite-monochromated  $\text{MoK}\alpha$  radiation ( $\lambda = 0.71073 \text{ \AA}$ ) at room temperature. The data were corrected for Lorentz and Polarization effects as well as for absorption. The structure was solved by direct methods and refined by full-matrix least-squares cycles in SHELX-97 and SHELX 2013.<sup>2</sup> The empirical formulae were confirmed by thermogravimetric analyses (TGA) and element analyses (EA) results. Selected hydrogen-bonding data of compound **1** and **2** are listed in Table S1 and Table S2, respectively.

CCDC-958717 and 958716 contain the supplementary crystallographic data of the crystals **1** and **2**, respectively. The data can be obtained free of charge at [www.ccdc.cam.ac.uk/conts/retrieving.html](http://www.ccdc.cam.ac.uk/conts/retrieving.html) or from the Cambridge Crystallographic Data Centre, 12, Union Road, Cambridge CB2 1EZ, UK.

**Table S1.** Selected hydrogen bond data for compound **1**.

| D–H...A              | <i>d</i> (D–H) | <i>d</i> (H...A) | <i>d</i> (D...A) | <(DHA) |
|----------------------|----------------|------------------|------------------|--------|
| N(1)–H(1C)...S(11)#2 | 0.89           | 2.30             | 3.174(4)         | 165.9  |
| N(1)–H(1D)...Cl(1)   | 0.89           | 2.27             | 3.151(4)         | 171.2  |
| N(1)–H(1E)...S(17)#3 | 0.89           | 2.57             | 3.273(4)         | 136.2  |
| N(2)–H(2C)...S(17)#4 | 0.89           | 2.38             | 3.252(4)         | 165.0  |
| N(2)–H(2D)...S(8)#2  | 0.89           | 2.39             | 3.215(4)         | 154.5  |
| N(2)–H(2E)...S(7)#5  | 0.89           | 2.49             | 3.347(4)         | 161.2  |
| C(1)–H(1B)...S(7)#5  | 0.97           | 2.82             | 3.657(4)         | 144.8  |
| N(3)–H(3C)...Cl(1)   | 0.89           | 2.29             | 3.162(4)         | 166.6  |
| N(3)–H(3D)...S(4)#6  | 0.89           | 2.59             | 3.400(4)         | 152.0  |
| N(3)–H(3E)...S(16)   | 0.89           | 2.41             | 3.295(4)         | 172.6  |
| N(4)–H(4C)...S(3)    | 0.89           | 2.67             | 3.341(4)         | 133.2  |
| N(4)–H(4D)...S(12)#2 | 0.89           | 2.41             | 3.247(4)         | 156.4  |
| N(4)–H(4E)...S(16)   | 0.89           | 2.40             | 3.270(4)         | 165.3  |
| N(5)–H(5C)...Cl(1)#2 | 0.89           | 2.23             | 3.115(4)         | 170.6  |
| N(5)–H(5D)...S(5)    | 0.89           | 2.70             | 3.338(4)         | 129.4  |
| N(5)–H(5D)...S(16)#2 | 0.89           | 2.75             | 3.389(4)         | 130.3  |
| N(5)–H(5E)...S(8)    | 0.89           | 2.34             | 3.214(3)         | 168.4  |
| N(6)–H(6C)...S(2)#7  | 0.89           | 2.55             | 3.252(4)         | 136.4  |
| N(6)–H(6D)...S(7)#7  | 0.89           | 2.31             | 3.181(4)         | 166.2  |
| N(6)–H(6E)...Cl(1)#8 | 0.89           | 2.23             | 3.113(4)         | 169.8  |
| C(5)–H(5A)...S(14)#2 | 0.97           | 2.87             | 3.782(4)         | 157.4  |
| N(7)–H(7C)...S(1)    | 0.89           | 2.71             | 3.519(3)         | 151.1  |
| N(7)–H(7D)...S(12)   | 0.89           | 2.50             | 3.282(4)         | 146.3  |
| N(7)–H(7E)...S(11)#9 | 0.89           | 2.43             | 3.324(4)         | 177.9  |

|                      |      |      |          |       |
|----------------------|------|------|----------|-------|
| N(8)–H(8C)...S(7)#10 | 0.89 | 2.77 | 3.403(4) | 129.3 |
| N(8)–H(8C)...S(8)#10 | 0.89 | 2.67 | 3.414(4) | 141.4 |
| N(8)–H(8D)...S(4)#2  | 0.89 | 2.51 | 3.367(4) | 162.5 |
| N(8)–H(8E)...S(16)   | 0.89 | 2.62 | 3.492(4) | 165.4 |
| N(9)–H(9C)...S(2)    | 0.89 | 2.85 | 3.504(4) | 131.4 |
| N(9)–H(9C)...S(3)    | 0.89 | 2.60 | 3.392(4) | 148.4 |
| N(9)–H(9D)...S(11)#9 | 0.89 | 2.59 | 3.296(3) | 137.2 |
| N(9)–H(9D)...S(12)#9 | 0.89 | 2.72 | 3.449(4) | 139.9 |
| N(9)–H(9E)...S(17)#1 | 0.89 | 2.44 | 3.320(3) | 170.9 |

Symmetry transformations used to generate equivalent atoms: #1  $-x,-y,-z+1$ ; #2  $-x+1,-y+1,-z+1$ ; #3  $x,y+1,z$ ; #4  $-x,-y+1,-z$ ; #5  $x,y+1,z-1$ ; #6  $-x,-y+1,-z+1$ ; #7  $-x+1,-y+1,-z+2$ ; #8  $x+1,y,z+1$ ; #9  $-x+1,-y,-z+1$ ; #10  $x,y,z-1$ .

**Table S2.** Selected hydrogen bond data for compound **2**.

| D–H...A             | $d(D-H)$ | $d(H...A)$ | $d(D...A)$ | $\angle(DHA)$ |
|---------------------|----------|------------|------------|---------------|
| N(1)–H(1C)...S(1)#4 | 0.89     | 2.84       | 3.388(7)   | 121.2         |
| N(1)–H(1C)...S(3)#4 | 0.89     | 2.52       | 3.273(7)   | 142.1         |
| N(1)–H(1D)...S(3)   | 0.89     | 2.46       | 3.330(7)   | 166.6         |
| N(1)–H(1E)...S(6)#1 | 0.89     | 2.64       | 3.471(8)   | 156.6         |
| N(2)–H(2C)...S(6)#5 | 0.89     | 2.81       | 3.489(8)   | 133.8         |
| N(2)–H(2D)...S(3)   | 0.89     | 2.55       | 3.430(7)   | 171.4         |
| N(2)–H(2E)...S(3)#6 | 0.89     | 2.46       | 3.231(7)   | 145.0         |
| N(2)–H(2E)...S(4)#6 | 0.89     | 2.84       | 3.456(7)   | 128.1         |
| C(2)–H(2B)...S(4)#7 | 0.97     | 2.80       | 3.723(9)   | 158.6         |

Symmetry transformations used to generate equivalent atoms: #1  $-x,-y+2,-z$ ; #2  $-x+1,-y+1,-z$ ; #3  $-x,-y+1,-z$ ; #4  $-x+1/2,y+1/2,-z+1/2$ ; #5  $x+1,y,z$ ; #6  $-x+3/2,y+1/2,-z+1/2$ ; #7  $x,y+1,z$ .

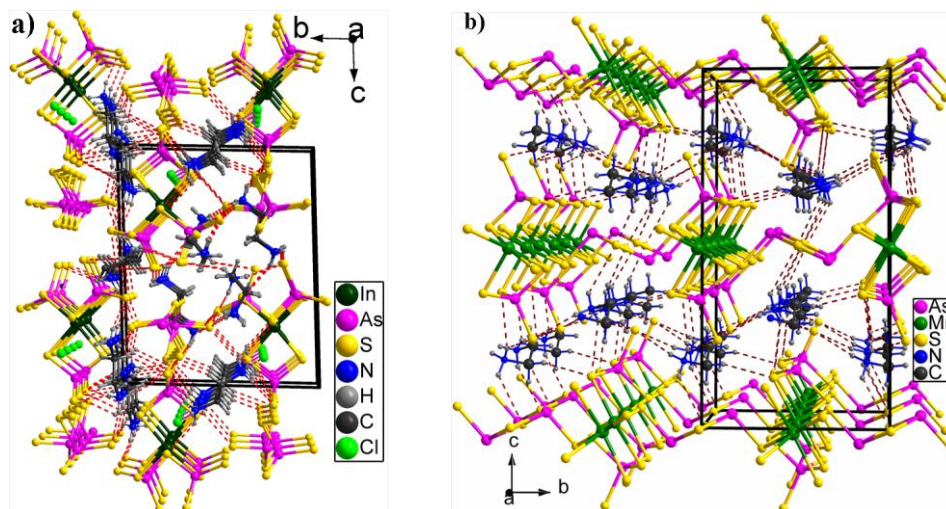

Figure S1. The H-bond networks of **1** (a) and **2** (b).

### 3. Theoretical Calculations

The density functional calculations were performed by the CASTEP package. The generalized gradient approximation (GGA) Perdew-Burke-Ernzerhof<sup>3</sup> was used in calculating the total energy

and band structure. For **1**, a plane wave cut off energy of 300 eV was set. The DOS calculations were performed in a  $2 \times 2 \times 1$  Monkhorst-Pack k-point grid within the Brillouin zone. The calculated band structure of **1** along high symmetry points (G(0,0,0), F(0,0.5,0), Q(0, 0.5,0), Z(0,0,0.5)), is plotted in Figure S2a. For **2**, a plane wave cut off energy of 280 eV was set. And we used a  $3 \times 2 \times 1$  Monkhorst-Pack k-point grid within the Brillouin zone in the DOS calculations. The calculated band structure of **2** along high symmetry points (G(0,0,0), Y(0,0.5,0), Z(0,0,0.5), B(-0.5,0,0), D(-0.5,0,0.5), E(-0.5,0.5,0.5), C(0,0.5,0.5), A(-0.5, 0.5,0)), is plotted in Figure S2b. Because of the unpaired electrons of Mn 3d in the compound **2**, the spin polarized and LDA+U method with initial spin of 5 and  $U = 2.5$  eV were employed.

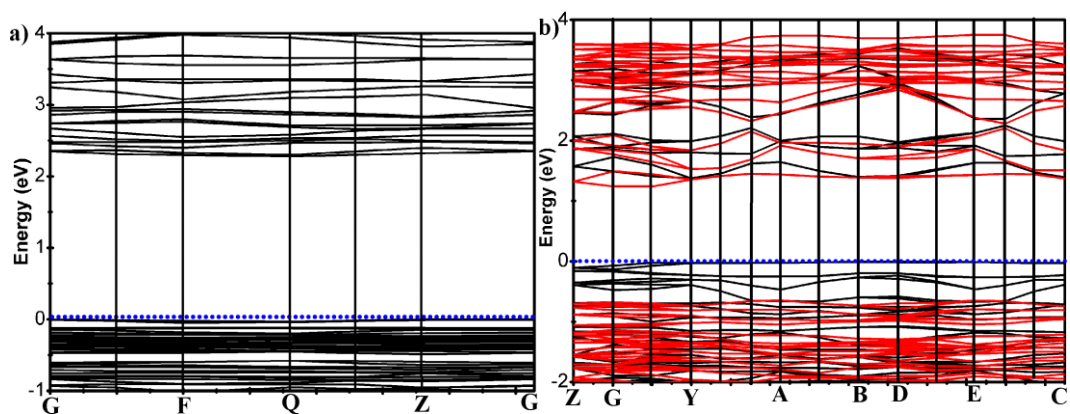

Figure S2. The band structures of **1** (a) and **2** (b). Fermi level is set at 0 eV(dot line). Black curve is spin up and red curve is spin down.

#### 4. Physical measurements

All chemicals were used as purchased without further purification. Element analyses of C, H and N were performed on a German Elementar Vario EL III instrument. The infrared spectrum was taken on a Magna 750 FTIR spectrometer with sample as KBr pellet in the range of 4000-400  $\text{cm}^{-1}$ . Powder X-ray diffraction (PXRD) patterns were recorded on a Miniflex II diffractometer at 30 kV and 15 mA using  $\text{CuK}\alpha$  (1.54178 Å), with a scan speed of  $1^\circ/\text{min}$  at room temperature. The simulated PXRD pattern from single crystal data was produced using the PowderCell program. Simultaneous thermoanalysis (TG–DSC) was carried out with a NETZSCH STA449C unit, at a heating rate of  $5^\circ\text{C}/\text{min}$  under a nitrogen atmosphere.

Thermogravimetric analyses (TGA) for **1** (8.925 mg) and **2** (5.198 mg) were performed on the pure powder samples in a  $\text{N}_2$  atmosphere. **1** had little weight loss until  $145^\circ\text{C}$ , and then decomposed with a weight loss of 75.68% from  $145^\circ\text{C}$  to  $800^\circ\text{C}$  gradually (Figure S4a). The  $\text{In}_2\text{S}_3$

could be identified in the X-ray powder pattern of the residue (Figure S5a). Whereas **2** was stable up to 160 °C, and then decomposed with a weight loss of 78.91% from 160 °C to 800 °C gradually (Figure S4b). The X-ray powder pattern suggested the main component of the residue is MnS (Figure S5b).

Optical diffuse reflectance spectrum was measured at room temperature with a Perkin-Elmer Lambda 900 UV/Vis spectrophotometer by using BaSO<sub>4</sub> powder as 100% reflectance and the room-temperature optical absorption spectrum of the title compound was obtained from diffuse reflectance experiment.<sup>4</sup> The variable-temperature magnetic susceptibilities (2~300k) were measured with a Quantum Design PPMS 6000 magnetometer under an applied field of 1000 Oe with the crystalline powder samples kept in a capsule for weighing.

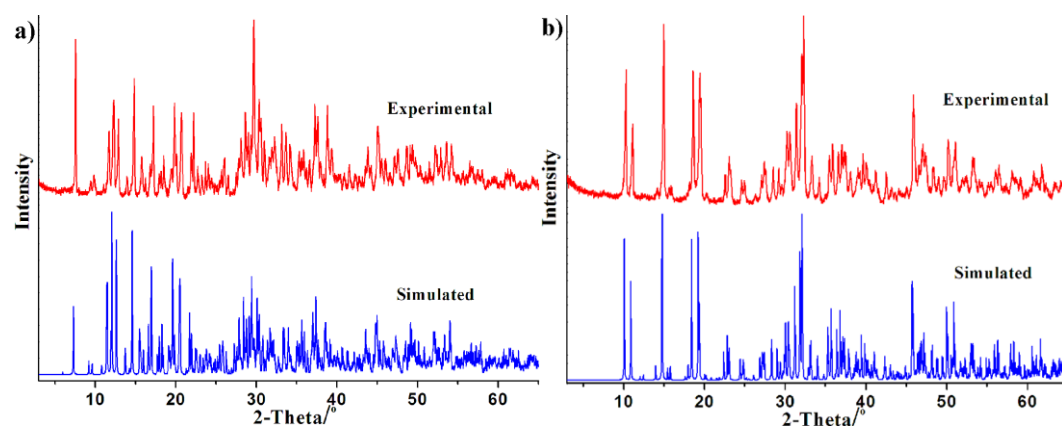

Figure S3 The PXRD patterns of **1** (a) and **2** (b) (red) is in good agreement with that simulated from the single crystal X-ray data (blue).

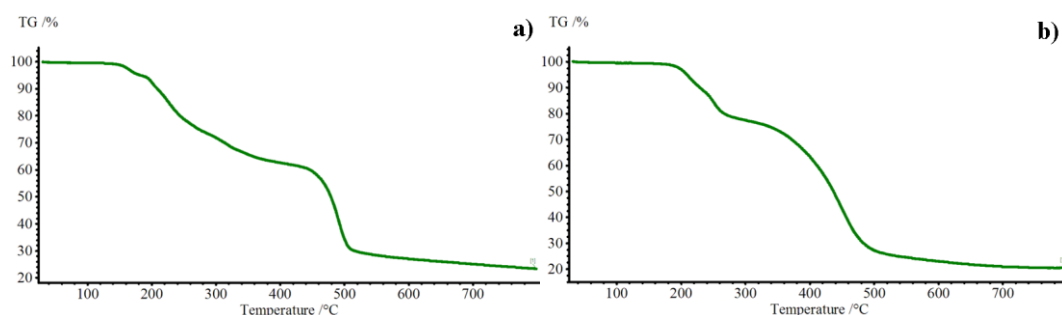

Figure S4 TG curves for compounds **1** (a) and **2** (b).

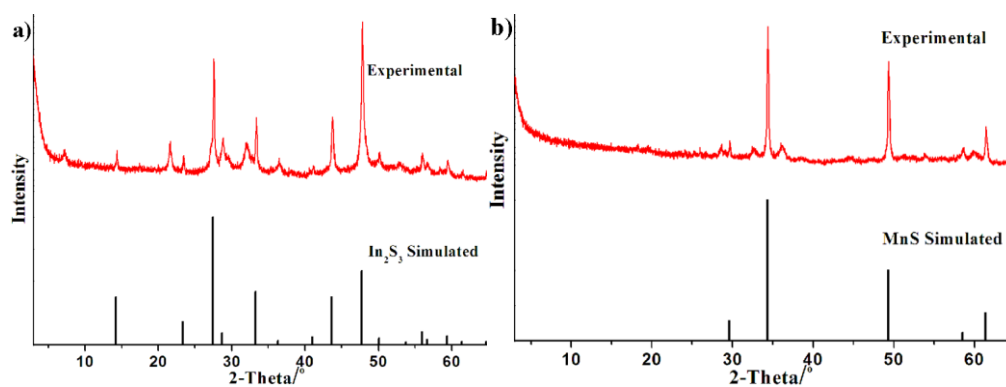

Figure S5 The PXRD patterns of the residues of **1** (a) and **2** (b) after 800°C

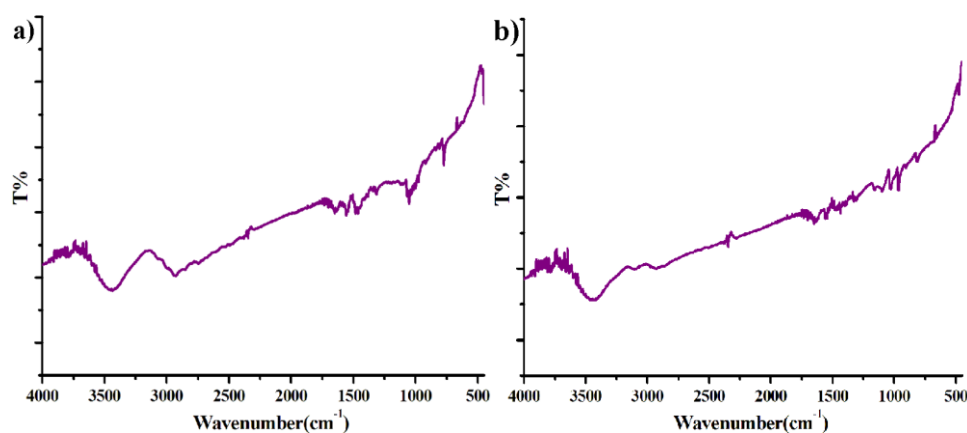

Figure S6 IR Spectra of compounds **1** and **2**.

## References

1. (a) Du, K.-Z.; Feng, M.-L.; Li, J.-R.; and Huang, X.-Y. *CrystEngComm*, **2013**, *15*, 5594-5597. (b) Du, K.-Z.; Feng, M.-L.; Li, J.-R.; and Huang, X.-Y. *CrystEngComm*, **2012**, *14*, 4959-4962.
2. Sheldrick, G. M., *SHELXS97 and SHELXL97*. University of Göttingen: Germany, 1997.
3. Perdew, J. P.; Burke, K.; Ernzerhof, M. *Phys. Rev. Lett.* **1996**, *77*, 3865-3868.
4. (a) Li, J.; Chen, Z.; Wang, X.-X.; Proserpio, D. M. *J. Alloy. Compd.* **1997**, *262*, 28-33; (b) Wendlandt, W. W.; Hecht, H. G., *Reflectance spectroscopy*. Interscience Publishers: New York, **1966**.
